# Supplementary material for: hsa_circ_0001275 Is One of a Number of circRNAs Dysregulated in Enzalutamide Resistant Prostate Cancer and Confers Enzalutamide Resistance In Vitro
Source: MDPI journal article supplement (doi:10.3390/cancers13246383), 2021-12-20
Supplement: s1 [file s1]

**Supplementary materials:**

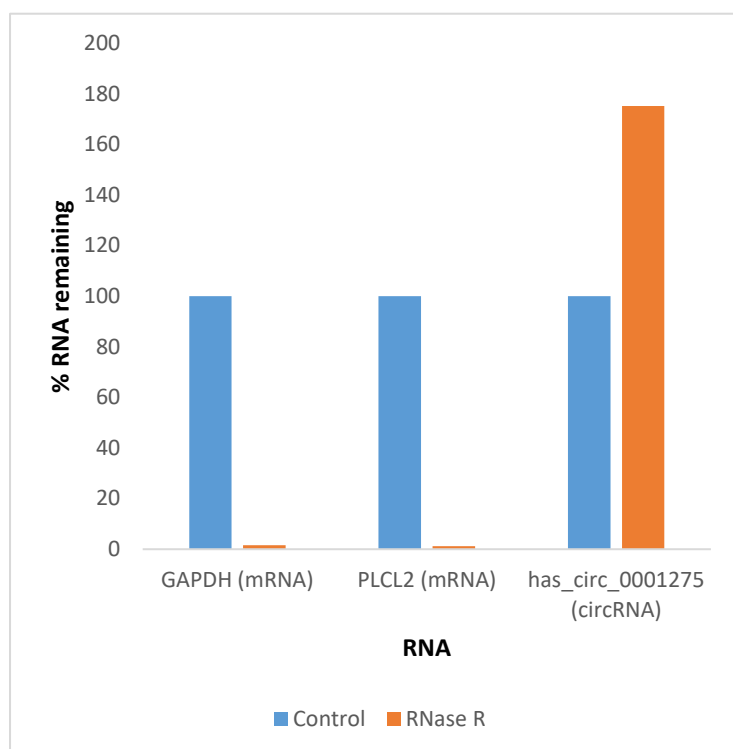

**Figure S1.** hsa\_circ\_0001275 enrichment using RNase R treatment. Total RNA was treated with RNase R, which digests only linear RNA instead of circular RNA. RT-qPCR data showing the resistance of circRNA to RNase R treatment as reflected by the levels of circRNA and linear RNAs in RNase R (orange) treated sample compared with control (blue) treatment. Following RNase R treatment, GAPDH and PLCL2 mRNA were depleted while hsa\_circ\_0001275 was not degraded, thus supporting the notion that RNase R digests linear RNA leading to enrichment of circRNA population. Data graphed as % RNA left after RNase R treatment relative to control using delta CT method.

**Table S1.** Custom designed Primer sequence for GAPDH, circRNAs and its associated parental gene.

| CircRNA          | Custom Designed Divergent Primers for RT-qPCR                       | Parental Gene | Custom Designed Convergent Primers                                |
|------------------|---------------------------------------------------------------------|---------------|-------------------------------------------------------------------|
| hsa_circ_0001275 | F: 5'-CCATCCCAGTCCAGTTCCTA-3'<br>R: 5'-AAGGGCCCTAGCTCAAGAAG-3'      | PLCL2         | F: 5'-GCACCAAGGAAGGTTTGAAGG-3'<br>R: 5'-TCAGTCCACATGAAACAGCAGC-3' |
| hsa_circ_0026462 | F: 5'-CCCATTTTCCTTGTGTTTGCTG-3'<br>R: 5'-TCCAGAGCCACCTCTGTAGC-3'    | KRT1          | F: 5'-CCTGGATCTGGAGATTGCCA-3'<br>R: 5'-TGCCACCTCCACTGATGGT-3'     |
| hsa_circ_0033144 | F: 5'-GACGAAGATGACCACCTGCT-3'<br>R: 5'-AGGCCACTTGCTCCTCTAT-3'       | BCL11B        | F: 5'-TGATCACTTCACCTCTGCGT-3'<br>R: 5'-CAAATGTAGCTGGAAGGCTCA-3'   |
| hsa_circ_0000673 | F: 5'-TCCAGTATCTGTAAACCTTCTGTCC-3'<br>R: 5'-GGAGCTTGCTTCATAGGATT-3' | RSL1D1        | F: 5'-CGAAATCCCACAGCTGGTACC-3'<br>R: 5'-GGGTCTCAGATGCTGGCAAA-3'   |
| hsa_circ_0000129 | F: 5'-AGAGGGAAATCCCAGCAGAG-3'<br>R: 5'-GCATGAGGAGTCAATGCAGA-3'      | VPS72         | F: 5'-TTCTGGGCTTTTGGAGGCAG-3'<br>R: 5'-GGCCTTGCTGACTACTCGGC-3'    |

|                  |                                                                 |       |                                                                      |
|------------------|-----------------------------------------------------------------|-------|----------------------------------------------------------------------|
| hsa_circ_0001721 | F: 5'-TCCTCCACTGGCAAAGAGTC-3'<br>R: 5'-CAGGAATTGTGTCCAGGGGTT-3' | CDK14 | F: 5'-CTGGCCTCCAAGCTCCTACA-3'<br>R: 5'-CCAGCTTCTGGTTGCAATCTC-3'      |
|                  |                                                                 | GAPDH | F: 5'-CGACCTGACCTGCCGTCTAGAA-3'<br>R: 5'-GGTGTCTGCTGGTGAAGTCCAGAG-3' |

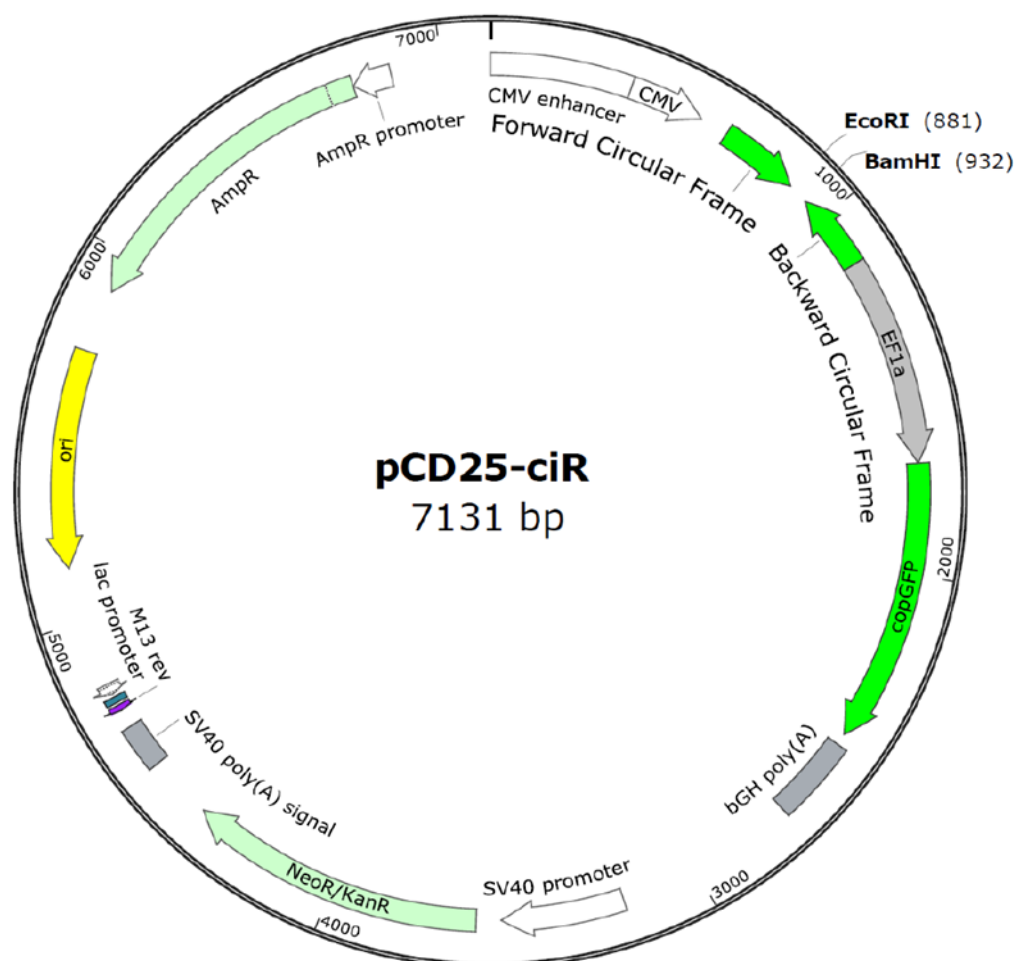

**Figure S2.** circRNA expressing vector pCD25-ciR (Cat no. GS0106). The sequences of the primers are as below:

Primer-F: 5'-CGGAATTCTAATACTTTTCAG + Original primer sequence-3',

Primer-R: 5'-CGGGATCCAGTTGTTCTTAC + Original primer sequence-3'.

The sequence of the PCR product of linear circRNA is as follow:

GAATTC TAATACTTTTC AG Linear sequence of circRNA GT AAGAACAACCT GGATCC  
CTTAAG ATTATGAAAG TC TTCTTGTGTA CCTAGG

**Table S2.** Custom designed Primer sequence for cloning of circRNAs.

|                  |                                                                                                                             |
|------------------|-----------------------------------------------------------------------------------------------------------------------------|
| circRNA          | Custom designed divergent primers for cloning                                                                               |
| hsa_circ_0001275 | F: 5'-CGGAATTCTAATACTTTTCAGGGCCCTTGCTCACCATTGGGAGGAAGAAGG-3'<br>R: 5'-CGGGATCCAGTTGTTCTTACCTAGCTCAAGAAGACAGGTATCAGAGCCAT-3' |

|                  |                                                                                                                             |
|------------------|-----------------------------------------------------------------------------------------------------------------------------|
| hsa_circ_0001721 | F: 5'-CGGAATTCTAATACTTTTCAGATATGTGTCACAAAGATGTCTACACGGAAC-3'<br>R: 5'-CGGGATCCAGTTGTTCTTACCGAGCTGGGGCTGGAGTGCCGCCTAACTTT-3' |
|------------------|-----------------------------------------------------------------------------------------------------------------------------|

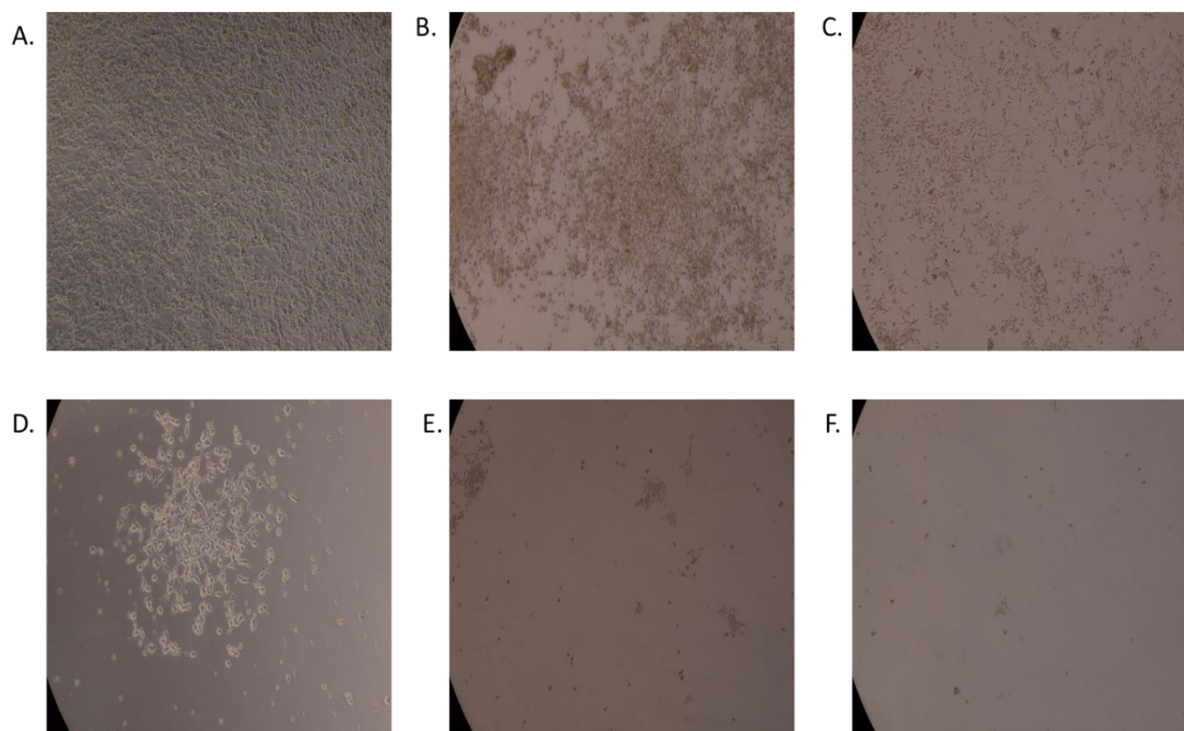

**Figure S3.** Representative images of LNCaP cells treated with a range of G418 concentration at the end of 7 days using bright field microscopy. G418 concentration: A=untreated, B=300 µg/ mL, C=400 µg/ mL, D=500 µg/ mL, E=600 µg/ mL, F=700 µg/ mL. All images are X10 magnification.

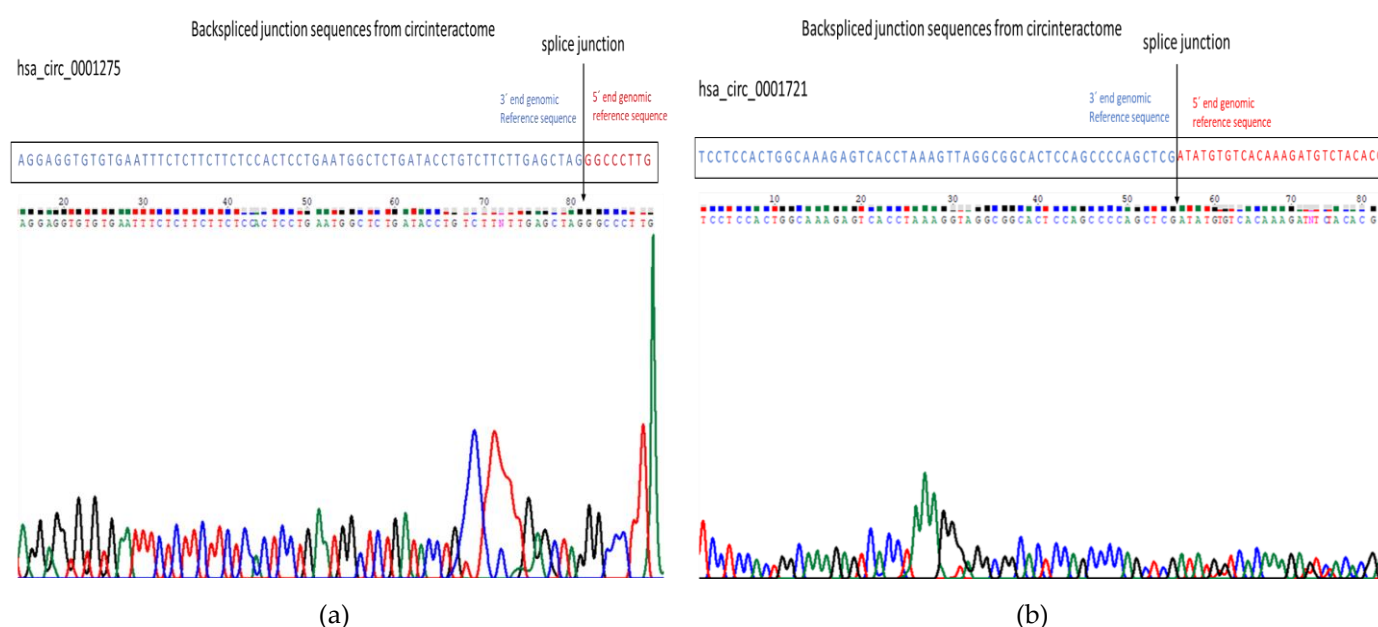

**Figure S4.** Validation of (a) hsa\_circ\_0001275 and (b) hsa\_circ\_0001721 by Sanger sequencing. Both RT-qPCR product sequence aligned to respective backspliced junction sequence obtained from circinteractome database.

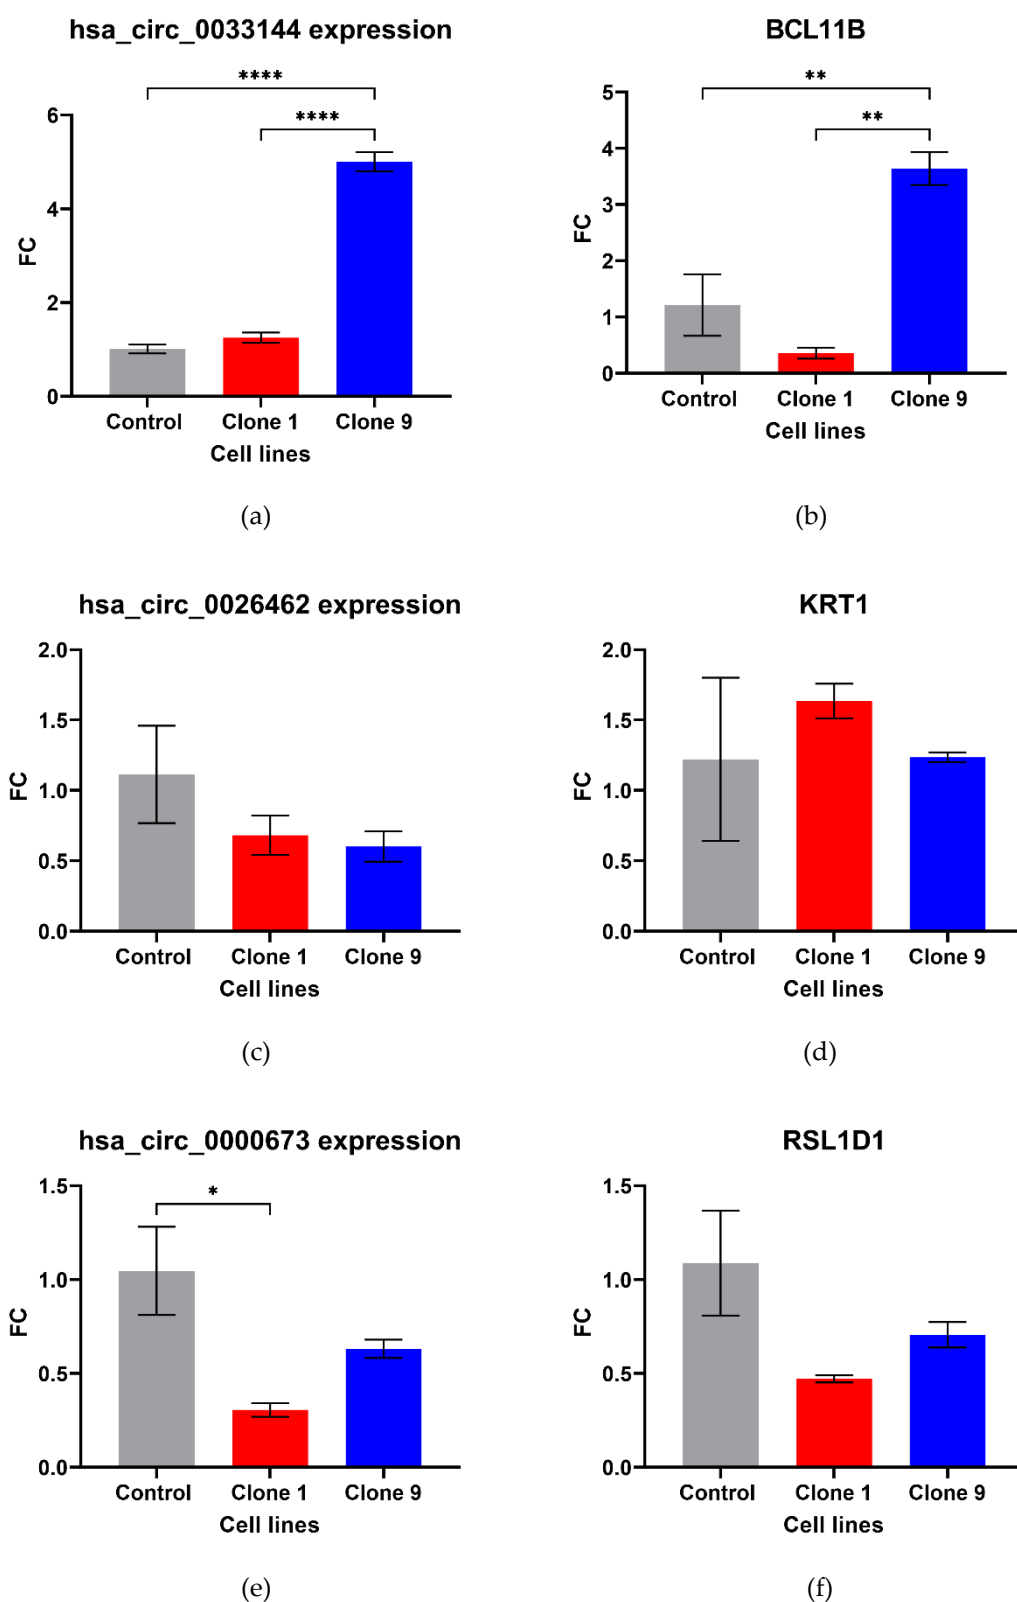

**Figure S5.** Validation of circRNAs and associated parental gene in the enzalutamide panel. (a) hsa\_circ\_0033144 and (b) it's parental gene BCL11B, (c) hsa\_circ\_0026462 and (d) it's parental gene KRT1, (e) hsa\_circ\_0000673 and (f) it's parental gene RSL1D1. Data graphed as mean  $\pm$  SEM (n=3). Data analysed using an ordinary one-way ANOVA followed by a Tukey's post-hoc test. (\* $p \leq 0.05$ , \*\* $p \leq 0.01$ , \*\*\*\* $p \leq 0.0001$ ).

**BrdU 1275 Stable vs. Control**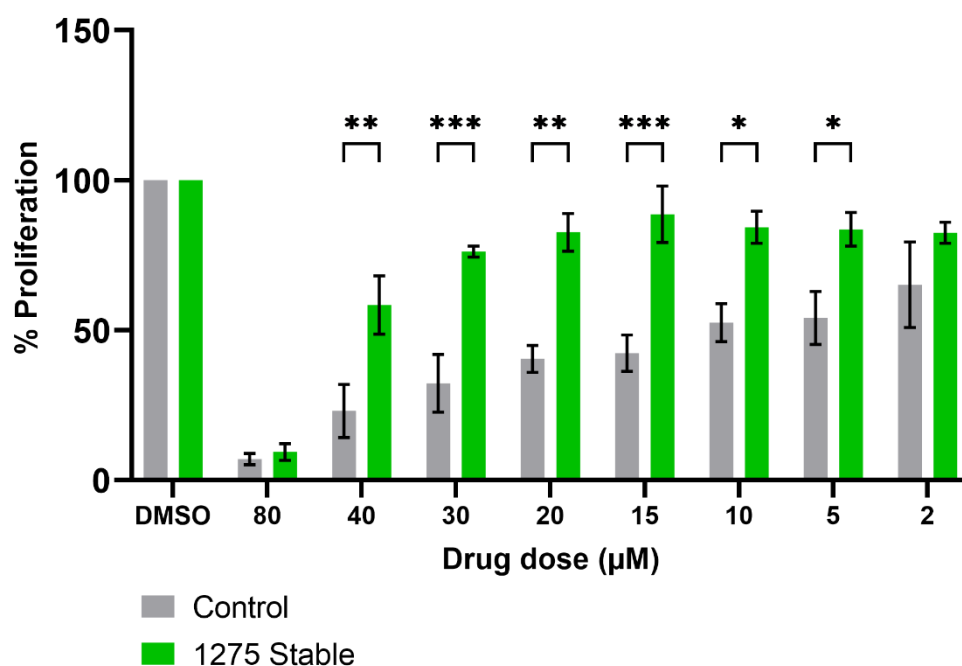

(a)

**BrdU 1721 Stable vs. Control**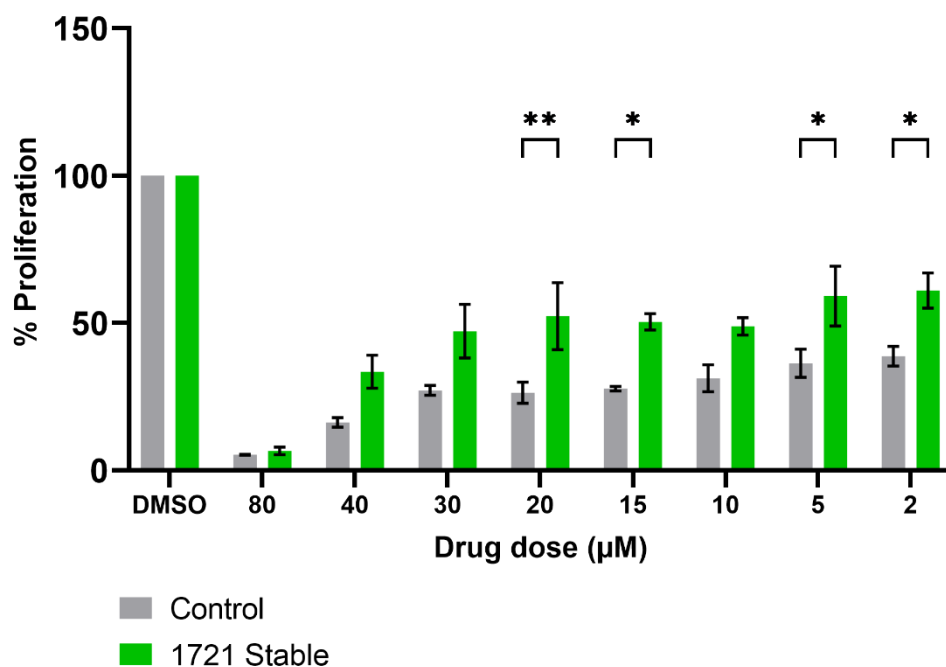

(b)

**Figure S6.** The effect of enzalutamide on the proliferative rate of Control and cell line overexpressing (a) hsa\_circ\_0001275 (1275 Stable) and (b) hsa\_circ\_0001721 (1721 Stable). Proliferation was measured using BrdU ELISA.

Data graphed as mean  $\pm$  SEM (n=3). Analysis was performed using a Two-way ANOVA followed by a Šídák's post-hoc test. (\* $p \leq 0.05$ , \*\* $p \leq 0.01$ , \*\*\* $p \leq 0.001$ ). Dimethyl Sulfoxide (DMSO).

**Table S3.** Custom design gBlock as positive control for hsa\_circ\_0001275 and hsa\_circ\_000721

| circR<br>NA                                                         | Custom Designed gBlock                                                                                                                                                                                                                                                                                                                                                                                                                                               |
|---------------------------------------------------------------------|----------------------------------------------------------------------------------------------------------------------------------------------------------------------------------------------------------------------------------------------------------------------------------------------------------------------------------------------------------------------------------------------------------------------------------------------------------------------|
| hsa_<br>circ_<br>0001<br>275<br>and<br>hsa_<br>circ_<br>0001<br>721 | 5'-<br>GAGTCCTCCACTGGCAAAGAGTCACCTAAAGTTAGGCGGCACTCCAGCCCCAGCTCGATATGTGTCACAAAGATGTCTACACG<br>GAACTGCCAGGGAATGGACTCAGTGATCAAACCCCTGGACACAATTCCTGCCAGAGGAGGAGCAGCTTACACTGATGAAGT<br>GTTAGACATCGAGATCAATGAACCTTTAGATGAATTTACAAATCAGTCGGATTTGTCAGATGAAGAGCTAAATGATGATCTTTT<br>GCAGAGTGATAATGAAGATGAAGAAAATTCAGTTCTCAGGGTGTACAACCATCCCAGTCCAGTTCCTACTAAAACTCCCTTA<br>ATCTGCCTAGTCTAAGGAGGTGTGTGAATTTCTTCTTCTCTCCACTCCTGAATGGCTCTGATACCTGTCTTCTTGAGCTAGGGCCC<br>TTACGC-3' |

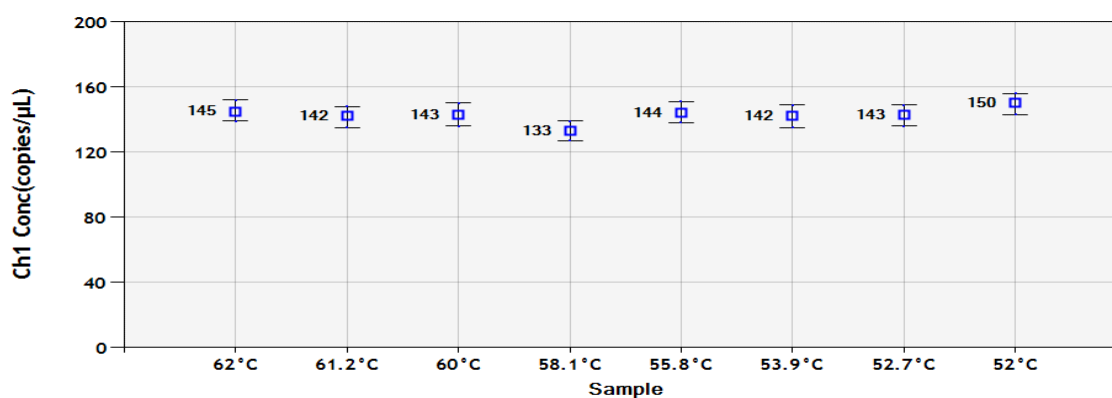

(a)

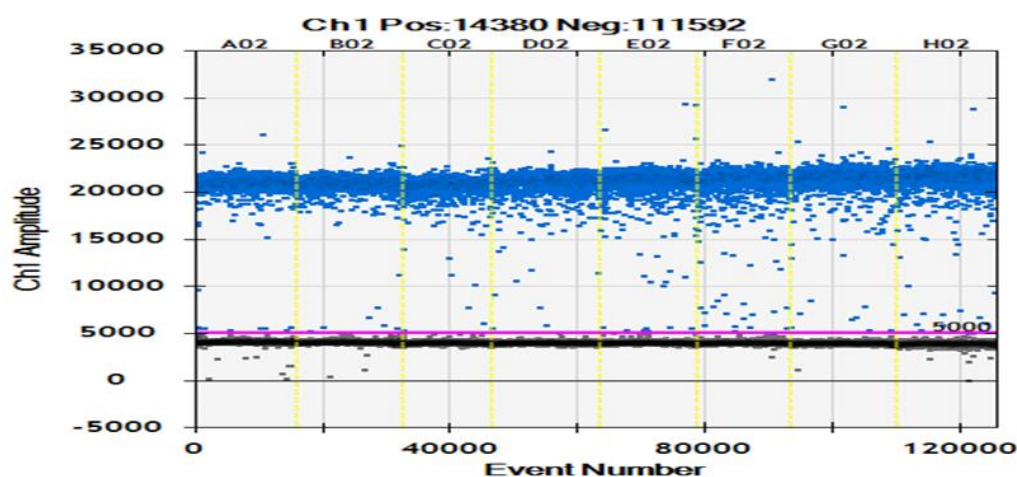

(b)

**Figure S7.** RT-ddPCR detection of circRNA. (a) RT-ddPCR assay optimisation of hsa\_circ\_0001275 using optimised primers and gBlock as positive control under a range of different temperature (52 °C to 62 °C). (b) Precise detection of hsa\_circ\_0001275 levels by RT-ddPCR with EvaGreen dye using gBlock positive control.

#### hsa\_circ\_0001275 expression

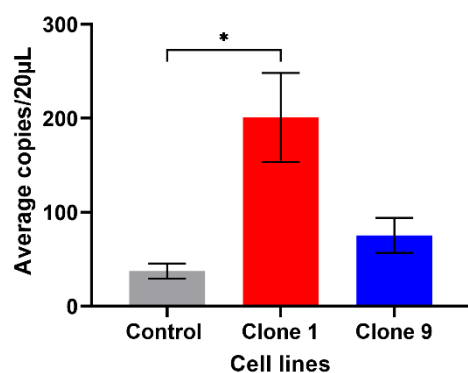

**Figure S8.** Absolute quantification of hsa\_circ\_0001275 in enzalutamide resistant panel. Data graphed as mean  $\pm$  SEM (n=3). Ordinary one-way ANOVA followed by a Tukey's post-hoc test. (\*p  $\leq$  0.05).

**Table S4.** (a) Relative average copies/20µL of transcript in Clone 1 to Control and Clone 9 to Control using RT-ddPCR. (b) Fold change in Clone 1 *vs.* Control and Clone 9 *vs.* Control using RT-qPCR.

| (a) RT-ddPCR hsa_circ_0001275 |              |          |
|-------------------------------|--------------|----------|
| Cell lines                    | copies/20µL  | ratio    |
| Clone 1 : Control             | 200.7 : 37.3 | 5.38 : 1 |
| Clone 9 : Control             | 75.3 : 37.3  | 2.02 : 1 |

| (b) RT-qPCR hsa_circ_0001275 |      |
|------------------------------|------|
| Cell lines                   | FC   |
| Clone 1 <i>vs.</i> Control   | 5.01 |
| Clone 9 <i>vs.</i> Control   | 2.86 |

**Table S5.** Top 5 target miRNAs predicted for has\_circ\_0001275 using Arraystar's miRNA prediction software based on Targetscan [1] and miRanda [2] with its hypothesized function and associated target gene.

| Predicted target miRNAs for has_circ_0001275 | Hypothesized miRNA function                                                                                                         | Hypothesized associated target gene | Hypothesized gene function                                                                                                                             | Reference |
|----------------------------------------------|-------------------------------------------------------------------------------------------------------------------------------------|-------------------------------------|--------------------------------------------------------------------------------------------------------------------------------------------------------|-----------|
| miR-361-5p                                   | Tumor suppressor-miR. Suppress cell growth and proliferation. Expression lower in CRPC <i>vs.</i> CSPC tissues.                     | STAT6                               | Oncogene. Expression higher in prostate cancer <i>vs.</i> normal tissue. Prognostic factor in CRPC. Regulates BCL-XL at transcriptional level in CRPC. | [3]       |
| miR-422a                                     | Tumor suppressor-miR. Expression reduced in prostate cancer <i>vs.</i> normal cell lines. Suppress Warburg effect by targeting PDK2 | PDK2                                | Oncogene. Promotes proliferation and Warburg effect.                                                                                                   | [4]       |
| miR-378a-3p                                  | Tumor suppressor-miR. Expression reduced in prostate cancer <i>vs.</i> BPH tissues. Prognostic marker for relapse.                  | KLK2 and KLK4                       | Oncogene. Increase tumorigenesis and metastasis.                                                                                                       | [5]       |
| miR-506-3p                                   | Tumor suppressor-miR. Suppress cell growth and proliferation and invasion. Induced cell cycle arrest and apoptosis.                 | ITGB1, ITGB3 and ITGA3              | Oncogene. Interacts with multiple extracellular matrix protein and mediate survival signalling in cancer.                                              | [6]       |
| miR-370-3p                                   | Onco-miR. Expression increase in prostate cancer <i>vs.</i> normal cells.                                                           | FOXO1                               | Tumor suppressor. Suppress cell growth and angiogenesis. Pro-apoptosis.                                                                                | [7]       |



## References.

1. Agarwal, V.; Bell, G.W.; Nam, J.W.; Bartel, D.P. Predicting effective microRNA target sites in mammalian mRNAs. *Elife* **2015**, *4*, doi:10.7554/eLife.05005.
2. John, B.; Enright, A.J.; Aravin, A.; Tuschl, T.; Sander, C.; Marks, D.S. Human MicroRNA targets. *PLoS Biol* **2004**, *2*, e363, doi:10.1371/journal.pbio.0020363.
3. Liu, D.; Tao, T.; Xu, B.; Chen, S.; Liu, C.; Zhang, L.; Lu, K.; Huang, Y.; Jiang, L.; Zhang, X., et al. MiR-361-5p acts as a tumor suppressor in prostate cancer by targeting signal transducer and activator of transcription-6(STAT6). *Biochem Biophys Res Commun* **2014**, *445*, 151-156, doi:10.1016/j.bbrc.2014.01.140.
4. He, Z.; Li, Z.; Zhang, X.; Yin, K.; Wang, W.; Xu, Z.; Li, B.; Zhang, L.; Xu, J.; Sun, G., et al. MiR-422a regulates cellular metabolism and malignancy by targeting pyruvate dehydrogenase kinase 2 in gastric cancer. *Cell Death Dis* **2018**, *9*, 505, doi:10.1038/s41419-018-0564-3.
5. Avgeris, M.; Stravodimos, K.; Scorilas, A. Loss of miR-378 in prostate cancer, a common regulator of KLK2 and KLK4, correlates with aggressive disease phenotype and predicts the short-term relapse of the patients. *Biol Chem* **2014**, *395*, 1095-1104, doi:10.1515/hsz-2014-0150.
6. Li, J.; Xu, Y.H.; Lu, Y.; Ma, X.P.; Chen, P.; Luo, S.W.; Jia, Z.G.; Liu, Y.; Guo, Y. Identifying differentially expressed genes and small molecule drugs for prostate cancer by a bioinformatics strategy. *Asian Pac J Cancer Prev* **2013**, *14*, 5281-5286.
7. Wu, Z.; Sun, H.; Zeng, W.; He, J.; Mao, X. Upregulation of MircoRNA-370 induces proliferation in human prostate cancer cells by downregulating the transcription factor FOXO1. *PLoS One* **2012**, *7*, e45825, doi:10.1371/journal.pone.0045825.
